# Supplementary material
Source: ML conference proceedings conference paper supplement (https://openreview.net/forum?id=P3n4wFJGs5)
Supplement: supplementary_material [file attachment]

## 549 A Shift-Detection General Framework

550 The general framework for shift-detection can be found in the following figure, Figure 3.

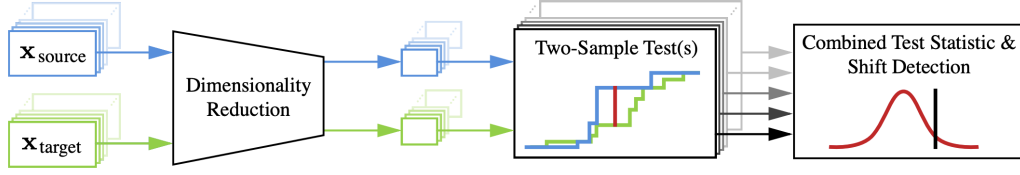

Figure 3: The procedure of detecting a dataset shift using dimensionality reduction and then a two-sample statistical test. The dimensionality reduction is applied to both the detection-training (source) and test (target) data, prior to being analyzed using statistical hypothesis testing. This figure is taken from [10].

## 551 B Proofs

### 552 B.1 Proof for Theorem 4.2

553 *Proof.* Define

$$\begin{aligned}\mathcal{B}_{\theta_i} &\triangleq b_i^*(m, m \cdot \hat{c}_i(\theta_i, S_m), \frac{\delta}{k}), \\ \mathcal{C}_{\theta_i} &\triangleq c(\theta_i, P).\end{aligned}$$

554 Consider the  $i^{\text{th}}$  iteration of SGR over a detection-training set  $S_m$ , and recall that,  $\theta_i = \kappa_f(x_z)$ ,  
555  $x_z \in S_m$  (see Algorithm 1). Therefore,  $\theta_i$  is a random variable (between zero and one), since it is a  
556 function of a random variable ( $x \in S_m$ ). Let  $\Pr_{S_m}\{\theta_i = \theta'\}$  be the probability that  $\theta_i = \theta'$ .

557 Therefore,

$$\begin{aligned}\Pr_{S_m}\{\mathcal{C}_{\theta_i} < \mathcal{B}_{\theta_i}\} &= \int_0^1 d\theta' \Pr_{S_m}\{\mathcal{C}_{\theta_i} < \mathcal{B}_{\theta_i} | \theta_i = \theta'\} \cdot \Pr_{S_m}\{\theta_i = \theta'\} \\ &= \int_0^1 d\theta' \Pr_{S_m}\{\mathcal{C}_{\theta'} < \mathcal{B}_{\theta'}\} \cdot \Pr_{S_m}\{\theta_i = \theta'\}.\end{aligned}$$

558 Since  $\mathcal{B}_{\theta_i}$  is obtained using Lemma 4.1 (see Algorithm 1), and  $\theta_i = \theta'$ ,

$$\Pr_{S_m}\{\mathcal{C}_{\theta_i} < \mathcal{B}_{\theta_i}\} = \Pr_{S_m}\{\mathcal{C}_{\theta'} < \mathcal{B}_{\theta'}\} < \frac{\delta}{k},$$

559 so we get,

$$\begin{aligned}\Pr_{S_m}\{\mathcal{C}_{\theta_i} < \mathcal{B}_{\theta_i}\} &= \int_0^1 d\theta' \Pr_{S_m}\{\mathcal{C}_{\theta'} < \mathcal{B}_{\theta'}\} \cdot \Pr_{S_m}\{\theta_i = \theta'\} \\ &< \int_0^1 d\theta' \frac{\delta}{k} \cdot \Pr_{S_m}\{\theta_i = \theta'\} \\ &= \frac{\delta}{k} \cdot \left( \int_0^1 d\theta' \Pr_{S_m}\{\theta_i = \theta'\} \right) \\ &= \frac{\delta}{k}.\end{aligned}\tag{5}$$

560 The following application of the union bound completes the proof,

$$\mathbf{Pr}_{S_m}\{\exists i : \mathcal{C}_{\theta_i} < \mathcal{B}_{\theta_i}\} \leq \sum_{i=1}^k \mathbf{Pr}_{S_m}\{\mathcal{C}_{\theta_i} < \mathcal{B}_{\theta_i}\} < \sum_{i=1}^k \frac{\delta}{k} = \delta.$$

561

□

## C Exploring Model Sensitivity: Evaluating Accuracy on Shifted Datasets

In this section, we present Table 3, which displays the accuracy (when applicable) as well as the degradation from the original accuracy over the ImageNet dataset, of the considered models on each of the simulated shifts mentioned in Section 6.1.1

| Shift Dataset                     | ResNet50 |                      | MobileNetV3 |                      | ViT-T  |                      |
|-----------------------------------|----------|----------------------|-------------|----------------------|--------|----------------------|
|                                   | Acc.     | ImageNet Degradation | Acc.        | ImageNet Degradation | Acc.   | ImageNet Degradation |
| FGSM $\epsilon = 7 \cdot 10^{-5}$ | 76.68%   | -3.7%                | 62.09%      | -3.15%               | 72.51% | -2.95%               |
| FGSM $\epsilon = 1 \cdot 10^{-4}$ | 75.19%   | -5.19%               | 60.72%      | -4.52%               | 71.49% | -3.97%               |
| FGSM $\epsilon = 3 \cdot 10^{-4}$ | 66.15%   | -14.23%              | 52.09%      | -13.15%              | 65.06% | -10.4%               |
| FGSM $\epsilon = 5 \cdot 10^{-4}$ | 59.23%   | -21.15%              | 44.45%      | -20.79%              | 58.9%  | -16.56%              |
| PGD $\epsilon = 1 \cdot 10^{-4}$  | 74.64%   | -5.74%               | 60.63%      | -4.61%               | 71.35% | -4.11%               |
| GAUSSIAN $\sigma = 0.1$           | 79.02%   | -1.36%               | 62.82%      | -2.42%               | 71.79% | -3.67%               |
| GAUSSIAN $\sigma = 0.3$           | 74.63%   | -5.75%               | 55.06%      | -10.18%              | 50.86% | -24.6%               |
| GAUSSIAN $\sigma = 0.5$           | 68.56%   | -11.82%              | 42.55%      | -22.69%              | 22.25% | -53.21%              |
| GAUSSIAN $\sigma = 1$             | 46.1%    | -34.28%              | 13.82%      | -51.42%              | 0.56%  | -74.9%               |
| ZOOM 50%                          | 65.55%   | -14.83%              | 36.96%      | -28.28%              | 46.04% | -29.42%              |
| ZOOM 70%                          | 74.31%   | -6.07%               | 53.53%      | -11.71%              | 62.69% | -12.77%              |
| ZOOM 90%                          | 78.6%    | -1.78%               | 61.28%      | -3.96%               | 72.08% | -3.38%               |
| ROTATION $\theta = 5^\circ$       | 76.7%    | -3.68%               | 62.42%      | -2.82%               | 71.27% | -4.19%               |
| ROTATION $\theta = 10^\circ$      | 72.4%    | -7.98%               | 58.22%      | -7.02%               | 67.29% | -8.17%               |
| ROTATION $\theta = 20^\circ$      | 68.29%   | -12.09%              | 49.96%      | -15.28%              | 62.38% | -13.08%              |
| ROTATION $\theta = 25^\circ$      | 70.08%   | -10.3%               | 50.95%      | -14.29%              | 60.97% | -14.49%              |

Table 3: Shifted dataset accuracy and comparison with ImageNet. We displays the accuracy results for each shifted dataset and model combination, along with the accuracy degradation when compared to the original ImageNet dataset.

## 566 D Extended Empirical Results

567 In this section, we present a detailed analysis of our empirical findings on the ResNet50 architecture.  
 568 We report the results for each window size,  $|W_k| \in \{10, 20, 50, 100, 200, 500, 1000\}$ , and for several  
 569 shift cases discussed in Section 6.1.1. In particular, we show the detection performance of all the  
 570 discussed methods, for the following shifts: FGSM (Table 4), ImageNet-O (Table 5), ImageNet-A  
 571 (Table 6), and the Zoom out shift, 90% (Table 7).

| Method          |            | Window size            |                        |                       |                       |                          |                        |                        |
|-----------------|------------|------------------------|------------------------|-----------------------|-----------------------|--------------------------|------------------------|------------------------|
|                 |            | 10                     | 20                     | 50                    | 100                   | 200                      | 500                    | 1000                   |
| KS              | Softmax    | 32/45/40/47/92         | 47/55/46/44/91         | 64/72/59/34/69        | 72/72/75/38/77        | 80/87/69/18/36           | <b>100/100/100/2/4</b> | <b>100/100/100/0/0</b> |
|                 | Embeddings | 54/58/55/ <b>43/86</b> | 32/39/48/49/100        | 54/64/49/39/80        | 41/44/48/50/99        | 37/48/45/47/92           | 60/70/59/30/60         | 71/77/61/33/68         |
| MMD             | Softmax    | 36/48/42/45/90         | 44/56/44/42/82         | 51/53/51/48/93        | 41/44/54/49/97        | 50/52/50/48/94           | 48/52/51/45/93         | 55/55/55/47/94         |
|                 | Embeddings | 61/56/60/48/95         | 57/57/59/45/93         | 72/73/67/36/73        | 63/70/56/38/71        | 63/69/55/37/75           | 67/70/61/39/74         | 70/79/59/28/54         |
| Single-instance | SR         | 34/45/40/47/93         | 69/68/72/42/82         | 43/52/50/45/90        | 54/54/61/47/93        | 62/64/58/42/86           | 66/73/59/35/72         | 72/69/73/43/86         |
|                 | Entropy    | 42/49/44/47/94         | 65/60/65/47/92         | 49/55/49/45/89        | 59/53/63/49/98        | 60/66/58/39/77           | 59/59/56/45/90         | 64/61/63/46/90         |
| Ours            |            | <b>71/64/75/45/92</b>  | <b>77/82/75/25/51*</b> | <b>88/90/85/20/39</b> | <b>84/86/84/25/49</b> | <b>99*/99*/99*/3*/5*</b> | 98/98/98/5/10          | <b>100/100/100/2/2</b> |

Table 4: Comparison of different evaluation metrics over **ResNet50** with the discussed baselines methods, over the FGSM shift with  $\epsilon = 0.0001$ . The best performing method is highlighted in **bold**; we add the superscript \* to the bolded result when it is statistically significant.

| Method          |            | Window size            |                        |                        |                        |                        |                        |                        |
|-----------------|------------|------------------------|------------------------|------------------------|------------------------|------------------------|------------------------|------------------------|
|                 |            | 10                     | 20                     | 50                     | 100                    | 200                    | 500                    | 1000                   |
| KS              | Softmax    | 62/59/60/46/94         | 70/61/75/48/94         | 98/98/98/6/11          | 99/99/99/5/10          | <b>100/100/100/0/0</b> | <b>100/100/100/0/0</b> | <b>100/100/100/0/0</b> |
|                 | Embeddings | 85/89/76/18/35         | <b>97/98/97/6*/12*</b> | 99/99/99/5/9           | <b>100/100/100/0/0</b> | <b>100/100/100/0/0</b> | <b>100/100/100/0/0</b> | <b>100/100/100/0/0</b> |
| MMD             | Softmax    | 43/53/47/44/87         | 74/75/73/39/72         | 94/92/96/33/51         | 97/97/98/31/27         | 97/97/98/32/26         | <b>100/100/100/0/0</b> | <b>100/100/100/0/0</b> |
|                 | Embeddings | <b>96/97/97*/10/20</b> | 95/94/97/33/39         | <b>100/100/100/0/0</b> | <b>100/100/100/0/0</b> | <b>100/100/100/0/0</b> | 94/95/97/31/46         | <b>100/100/100/0/0</b> |
| Single-instance | SR         | 62/63/60/43/87         | 31/41/38/48/98         | 47/56/44/41/86         | 56/57/63/45/85         | 51/51/53/48/97         | 37/41/42/50/100        | 42/44/47/49/100        |
|                 | Entropy    | 64/66/68/40/81         | 39/42/53/50/99         | 41/52/45/44/90         | 58/66/52/37/75         | 54/51/55/49/99         | 52/55/53/48/90         | 84/85/84/26/52         |
| Ours            |            | 61/61/61/47/92         | 84/89/77/18/37         | 99/99/99/5/8           | <b>100/100/100/0/0</b> | <b>100/100/100/0/0</b> | <b>100/100/100/0/0</b> | <b>100/100/100/0/0</b> |

Table 5: Comparison of different evaluation metrics over **ResNet50** with the discussed baselines methods, over the ImageNet-O shift. The best performing method is highlighted in **bold**; we add the superscript \* to the bolded result when it is statistically significant.

| Method          |            | Window size            |                        |                        |                        |                        |                        |                        |
|-----------------|------------|------------------------|------------------------|------------------------|------------------------|------------------------|------------------------|------------------------|
|                 |            | 10                     | 20                     | 50                     | 100                    | 200                    | 500                    | 1000                   |
| KS              | Softmax    | <b>100/100/100/0/0</b> |
|                 | Embeddings | 98/98/98/7/14          | <b>100/100/100/0/0</b> | <b>100/100/100/0/0</b> | <b>100/100/100/0/0</b> | <b>100/100/100/0/0</b> | <b>100/100/100/0/0</b> | <b>100/100/100/0/0</b> |
| MMD             | Softmax    | <b>100/100/100/0/0</b> |
|                 | Embeddings | <b>100/100/100/0/0</b> |
| Single-instance | SR         | <b>100/100/100/0/0</b> |
|                 | Entropy    | <b>100/100/100/0/0</b> |
| Ours            |            | <b>100/100/100/0/0</b> |

Table 6: Comparison of different evaluation metrics over **ResNet50** with the discussed baselines methods, over the ImageNet-A shift. The best performing method is highlighted in **bold**; we add the superscript \* to the bolded result when it is statistically significant.

| Method          |            | Window size           |                       |                       |                       |                                   |                                                                                    |                        |  |
|-----------------|------------|-----------------------|-----------------------|-----------------------|-----------------------|-----------------------------------|------------------------------------------------------------------------------------|------------------------|--|
|                 |            | 10                    | 20                    | 50                    | 100                   | 200                               | 500                                                                                | 1000                   |  |
| KS              | Softmax    | 42/49/48/47/93        | 53/52/54/47/97        | 61/69/57/37/74        | 71/72/69/39/77        | <b>91/92/91<sup>*</sup>/15/30</b> | <b>100<sup>*</sup>/100<sup>*</sup>/100<sup>*</sup>/2<sup>*</sup>/3<sup>*</sup></b> | <b>100/100/100/0/0</b> |  |
|                 | Embeddings | 46/51/52/46/92        | 25/45/38/44/87        | 56/58/54/44/86        | 46/46/53/49/98        | 35/44/42/49/97                    | 27/38/38/50/99                                                                     | 41/46/46/47/97         |  |
| MMD             | Softmax    | 48/51/50/46/93        | 46/44/52/50/100       | 51/57/52/45/88        | 50/56/52/46/88        | 52/57/49/46/88                    | 51/57/47/44/90                                                                     | 53/53/54/49/96         |  |
|                 | Embeddings | 57/56/61/48/91        | 54/63/49/41/83        | 68/67/73/40/82        | 37/53/41/43/83        | 28/41/38/49/97                    | 31/38/41/50/100                                                                    | 18/35/34/49/100        |  |
| Single-instance | SR         | 28/38/38/50/100       | 45/45/48/51/99        | 44/53/53/43/87        | 52/59/53/42/84        | 65/68/59/41/85                    | 74/73/78/38/78                                                                     | 84/84/83/31/62         |  |
|                 | Entropy    | 29/38/39/50/100       | 50/47/56/51/100       | 51/53/58/46/91        | 61/63/66/41/83        | 71/74/61/36/72                    | 76/73/81/39/77                                                                     | 87/86/87/29/58         |  |
| Ours            |            | <b>70/61/77/47/95</b> | <b>69/73/68/35/70</b> | <b>81/86/75/22/43</b> | <b>72/75/71/34/67</b> | 76/82/71/23/46                    | 94/94/94/15/31                                                                     | <b>100/100/100/0/0</b> |  |

Table 7: Comparison of different evaluation metrics over **ResNet50** with the discussed baselines methods, over the Zoom out (90%) shift. The best performing method is highlighted in **bold**; we add the superscript \* to the bolded result when it is statistically significant.

## E Ablation Study

In this section, we conduct multiple experiments to analyze the various components of our framework; all those experiments are conducted using a ResNet50. We explore several hyper-parameter choices, including  $C_{\text{target}}$ ,  $\delta$ , and  $\kappa_f$ . More specifically, we consider  $C_{\text{target}} \in \{1, 10, 100\}$ , and  $\delta \in \{0.1, 0.01, 0.001, 0.0001\}$ , and two different CFs  $\kappa_f$ , namely SR and Entropy-based.

To evaluate the performance of our detectors under varying hyper-parameters, we have selected a single metric that we believe to be the most important, namely, AUROC [46]. Additionally, since performance may vary depending on window size, we display the average AUROC across all window sizes that we have considered in our experiments. These window sizes include:  $\{10, 20, 50, 100, 200, 500, 1000\}$ . In Figure 4, we summarize our findings by displaying the average AUROC value as a function of the chosen hyper-parameters. These results are presented as heatmaps.

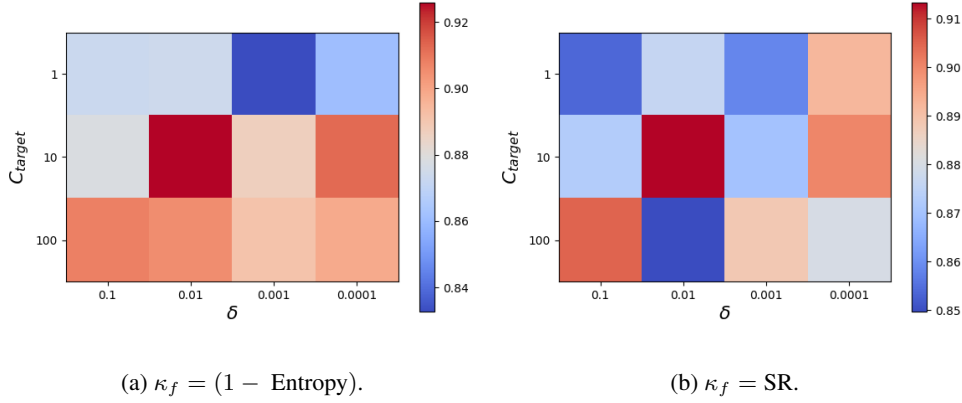

Figure 4: AUROC performance of our detector under different choices of hyper-parameters.

Figure 4a displays our AUROC detector’s performance when we use Entropy-based as our CF. We observe that the optimal choice of hyper-parameters is  $\delta = 0.01$  and  $C_{\text{target}} = 10$ , resulting in the highest performance. However, increasing the value of  $C_{\text{target}}$  leads to a more consistent and robust detector, as changes in the value of  $\delta$  do not significantly affect the detector’s performance. Additionally, we note that using  $C_{\text{target}} = 1$  yields relatively poor performance, indicating that a single coverage choice is insufficient to capture the characteristics of the distribution represented by the sample  $S_m$ . Similar results are obtained when using SR as the CF, as shown in Figure 4b. These results suggest that selecting a high value of  $C_{\text{target}}$  and a low value of  $\delta$  is the most effective approach for ensuring a robust detector. Finally, the heatmaps demonstrate that Entropy-based CF outperforms (by a low margin) SR, in terms of detection performance.
